# Supplementary material
Source: Springer Nature journal article supplement (https://www.springermedizin.de/resource/supplementary/12906_2006_118_MOESM5_ESM.pdf/9524108)

- Ethanolic EU extract (cf\*) (1 cf=50ng dry weight/ml treatment medium)
- DHT (nM)
- △ Cortisol (nM)

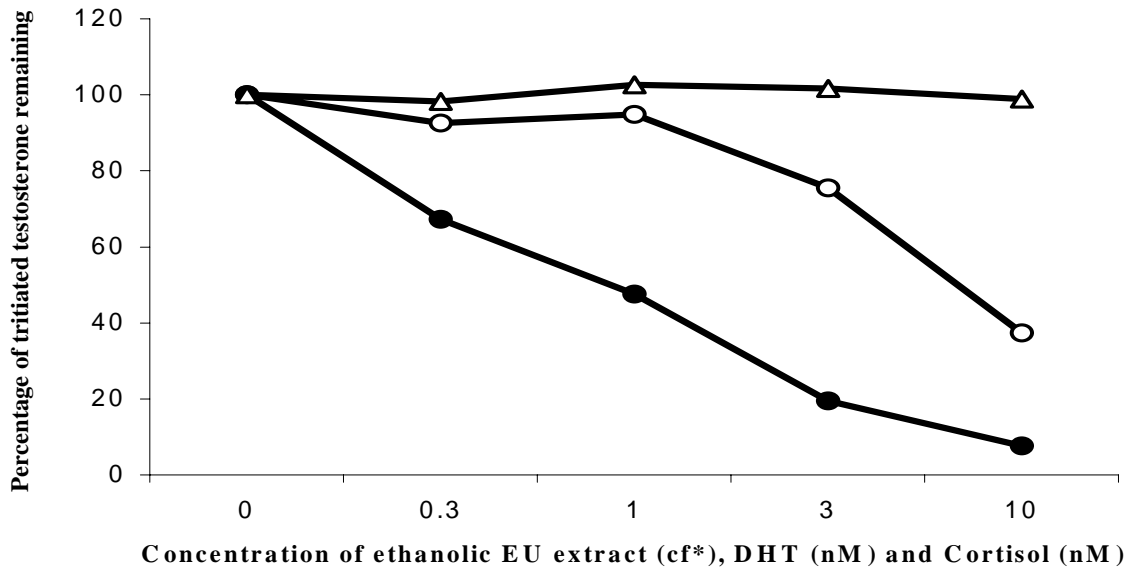

Supplement: MOESM5 [file 9524108]
